# Supplementary material for: Use of Tumor Markers in Gastrointestinal Cancers: Surgeon Perceptions and Cost-Benefit Trade-Off Analysis
Source: Springer Nature journal article supplement (doi:10.1245/s10434-016-5717-y), 2016-12-22

## APPENDICES

**Appendix 1:** Diagram detailing the literature search strategy.

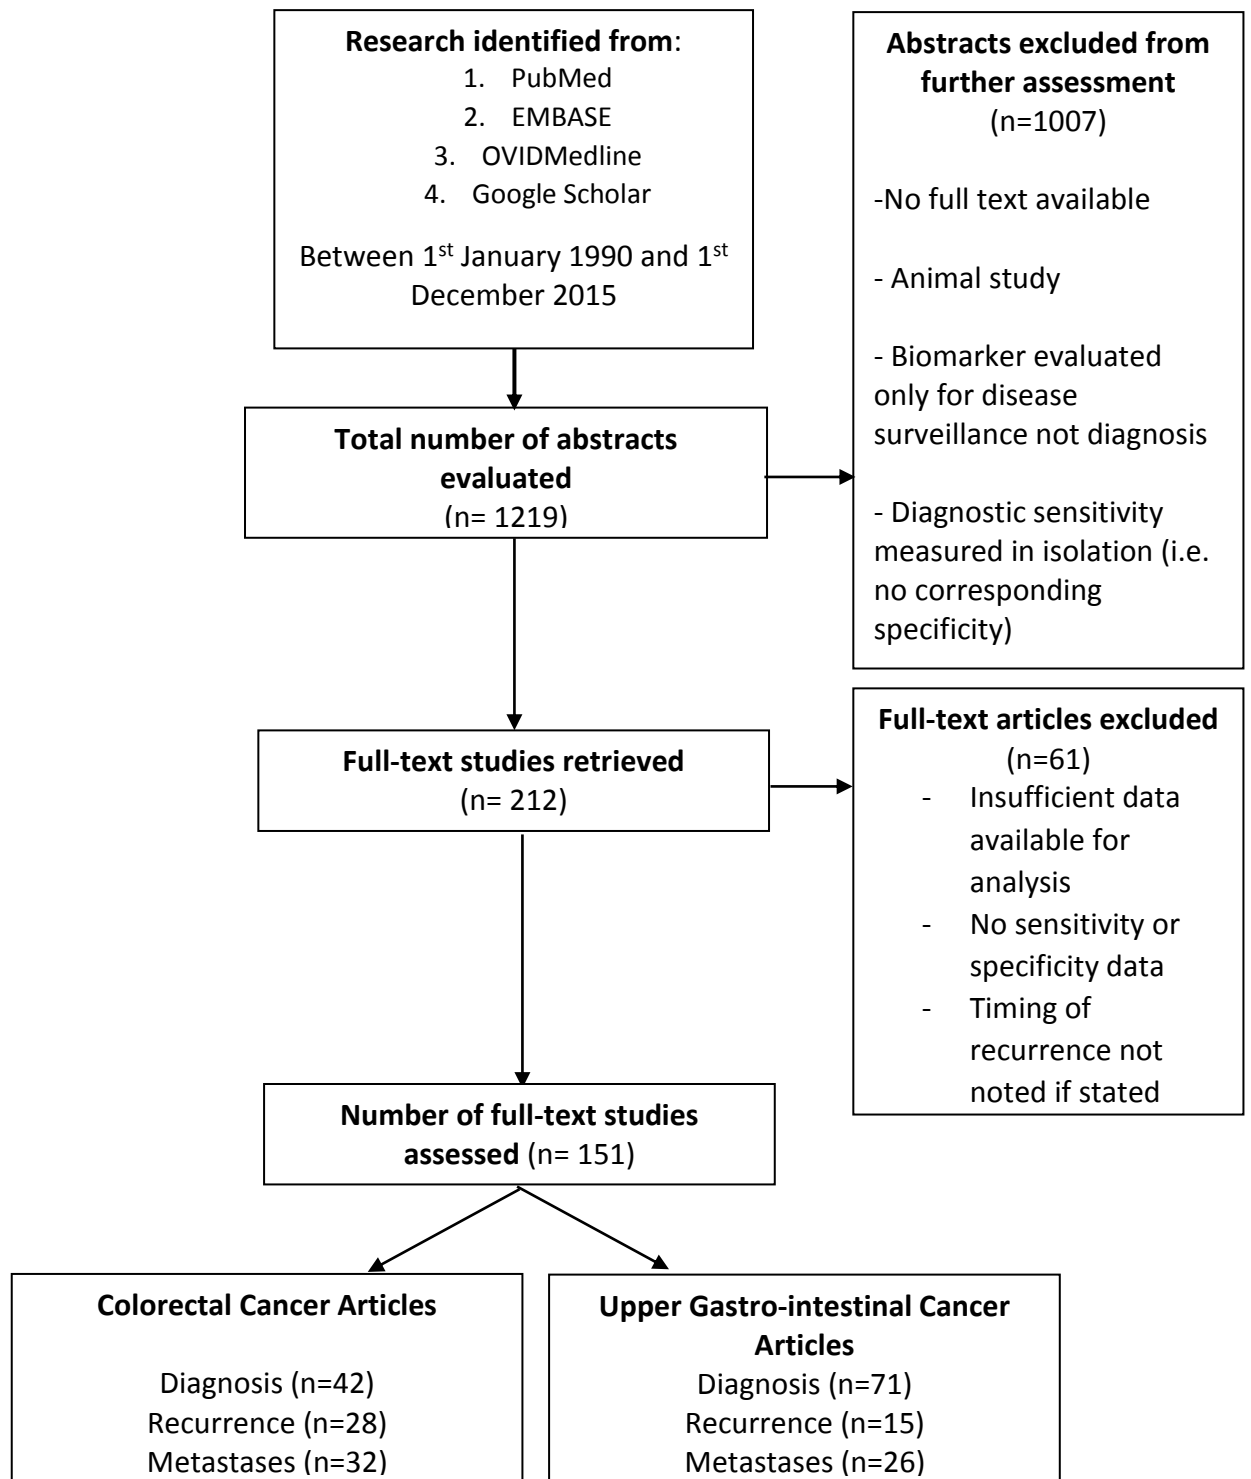

Supplement: MOESM1 [file 11954826]
